# Supplementary material for: Morphologic Changes in Esophageal Body Movement During Bolus Transport After Peroral Endoscopic Myotomy in Type III Achalasia
Source: PubMed Central journal article supplement — J Neurogastroenterol Motil. 2022 Jan 30;28(1):131–44. doi: 10.5056/jnm21020 (PMC8748845; doi:10.5056/jnm21020), 2022-01-30
Supplement: jnm-28-1-131-supple.pdf [file jnm-28-1-131-supple.pdf]

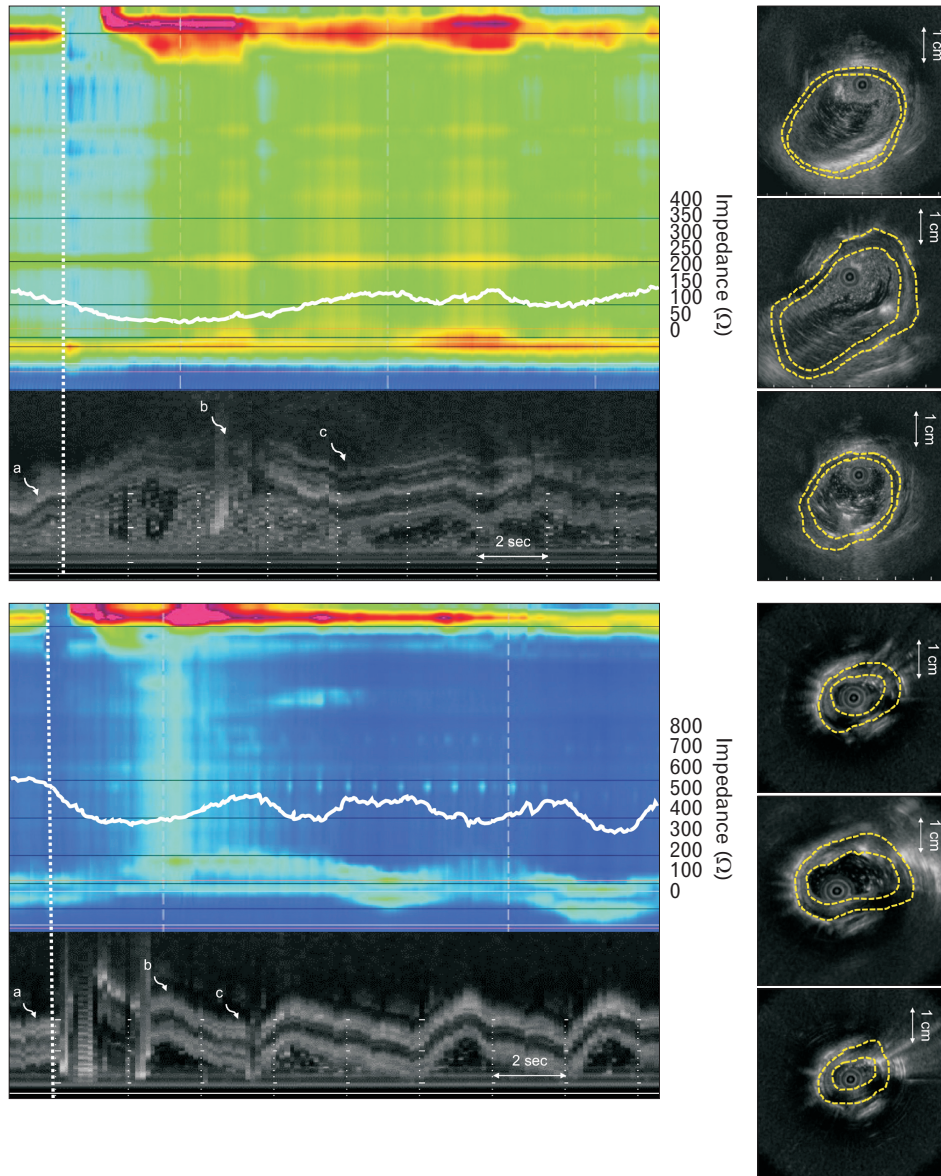

**Supplementary Figure 1.** Changes in cross-sectional movement in the distal esophageal body after peroral endoscopic myotomy in type II achalasia at baseline, peak distension, and contraction points (curved arrows a, b, and c). The muscle thickness increased, and the lumen cross-sectional area decreased. Additionally, panesophageal pressurization disappeared.

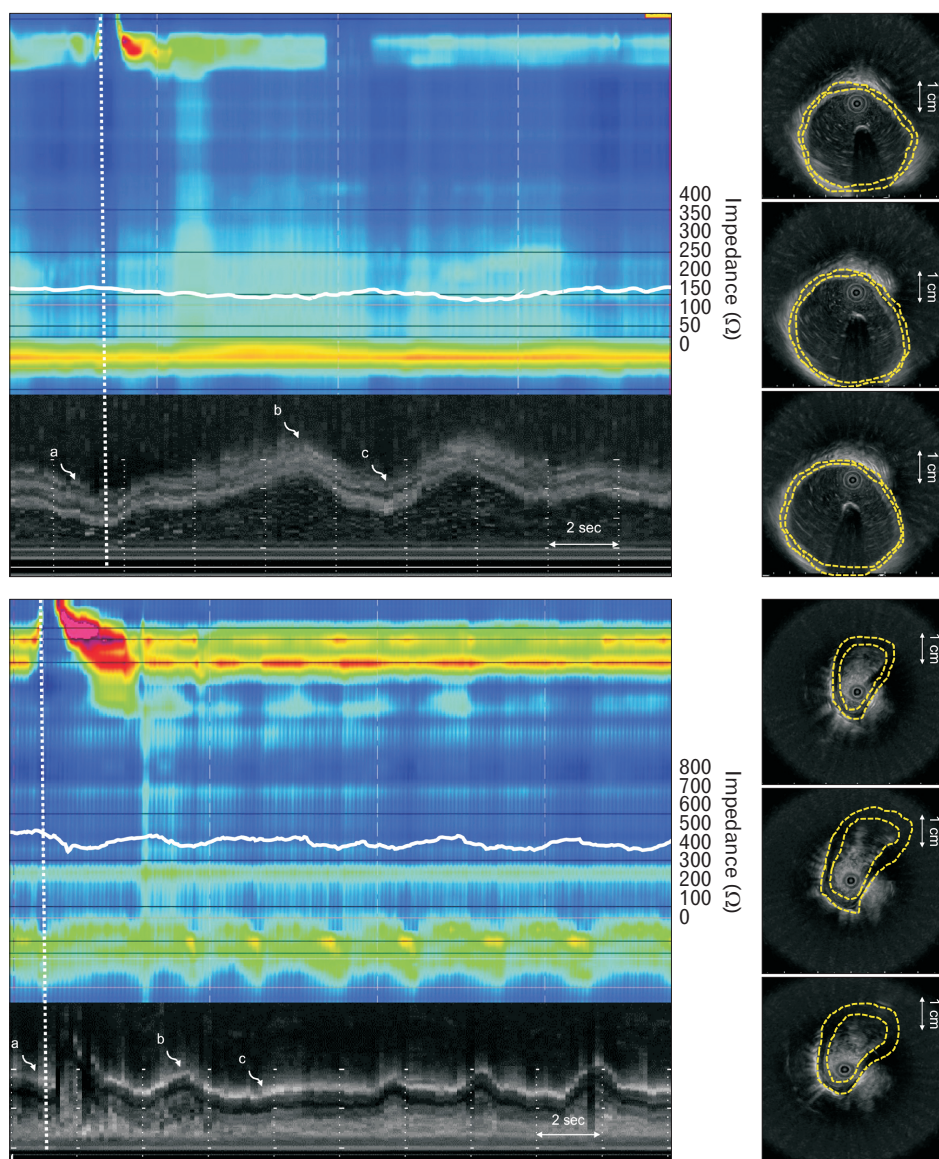

**Supplementary Figure 2.** Changes in cross-sectional movement in the distal esophageal body after peroral endoscopic myotomy in type I achalasia at baseline, peak distension, and contraction points (curved arrows a, b, and c). The muscle thickness increased, and the lumen cross-sectional area decreased; however, the esophageal body contractility during bolus transit was not improved.
